# Supplementary material for: Developmental environment mediates male seminal protein investment in Drosophila melanogaster
Source: PubMed Central journal article supplement (PMC4974917; doi:10.1111/1365-2435.12515), 2015-08-20

Supplemental Fig 1

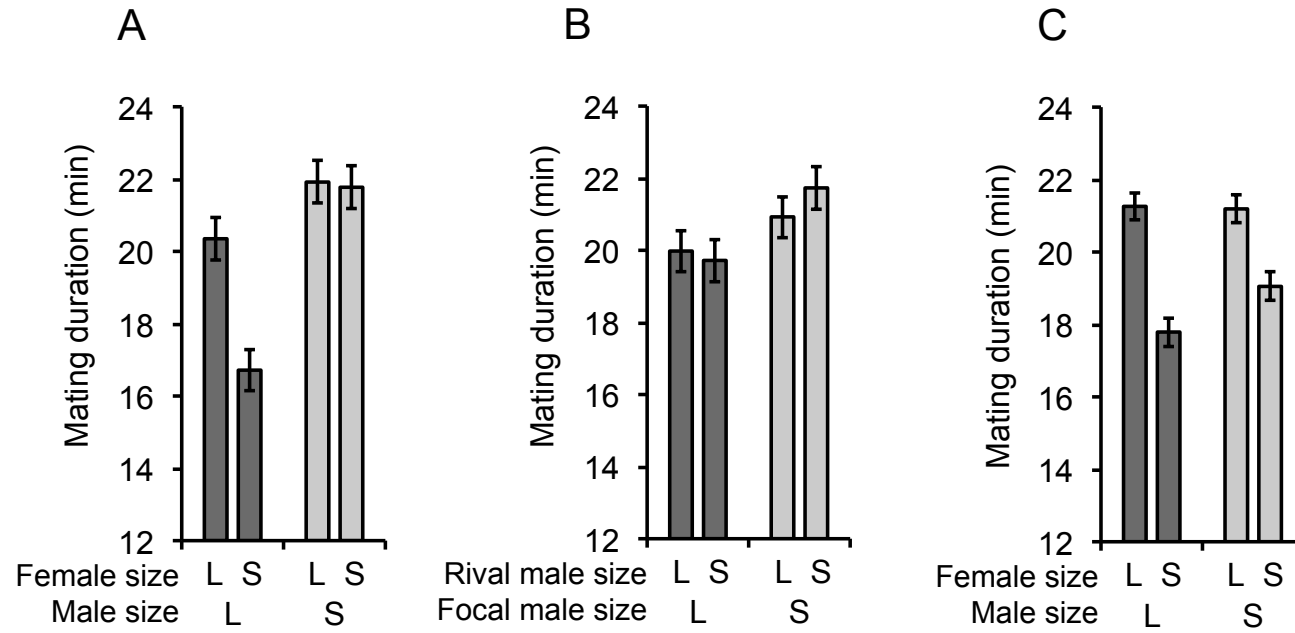

Supplemental Figure 2

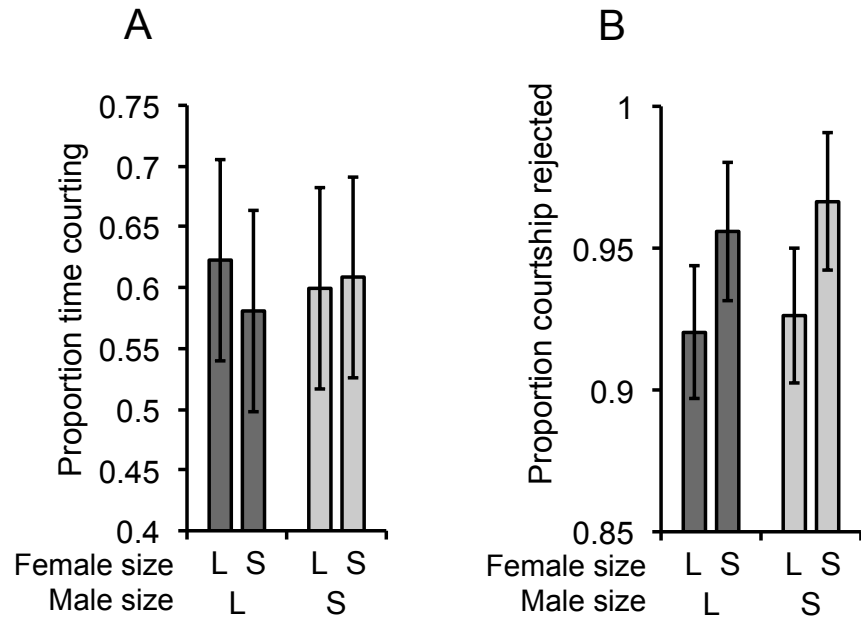

Supplement: FEC-30-410-s002.pdf [file FEC-30-410-s002.pdf]
